# Supplementary material for: Monsoonal rainfall characteristics in the context of climate adaptation planning for rain-fed agriculture in the Sudano-Sahelian area of Northwestern Nigeria
Source: Research Square preprint supplement (doi:10.21203/rs.3.rs-206299/v1), 2021-06-07
Supplement: Supplementary file 1 [file 6d63408e5c0bf3036d61a169.xlsx]

## Sheet: Sheet1
Sokoto
1981	1	1	0
1981	1	2	0
1981	1	3	0
1981	1	4	0
1981	1	5	0
1981	1	6	0
1981	1	7	0
1981	1	8	0
1981	1	9	0
1981	1	10	0
1981	1	11	0
1981	1	12	0
1981	1	13	0
1981	1	14	0
1981	1	15	0
1981	1	16	0
1981	1	17	0
1981	1	18	0
1981	1	19	0
1981	1	20	0
1981	1	21	0
1981	1	22	0
1981	1	23	0
1981	1	24	0
1981	1	25	0
1981	1	26	0
1981	1	27	0
1981	1	28	0
1981	1	29	0
1981	1	30	0
1981	1	31	0
1981	2	1	0
1981	2	2	0
1981	2	3	0
1981	2	4	0
1981	2	5	0
1981	2	6	0
1981	2	7	0
1981	2	8	0
1981	2	9	0
1981	2	10	0
1981	2	11	0
1981	2	12	0
1981	2	13	0
1981	2	14	0
1981	2	15	0
1981	2	16	0
1981	2	17	0
1981	2	18	0
1981	2	19	0
1981	2	20	0
1981	2	21	0
1981	2	22	0
1981	2	23	0
1981	2	24	0
1981	2	25	0
1981	2	26	0
1981	2	27	0
1981	2	28	0
1981	3	1	0
1981	3	2	0
1981	3	3	0
1981	3	4	0
1981	3	5	0
1981	3	6	0
1981	3	7	0
1981	3	8	0
1981	3	9	0
1981	3	10	0
1981	3	11	0
1981	3	12	0
1981	3	13	0
1981	3	14	0
1981	3	15	0
1981	3	16	0
1981	3	17	0
1981	3	18	0
1981	3	19	0
1981	3	20	0
1981	3	21	0
1981	3	22	0
1981	3	23	0
1981	3	24	0
1981	3	25	0
1981	3	26	0
1981	3	27	0
1981	3	28	0
1981	3	29	0
1981	3	30	0
1981	3	31	0
1981	4	1	0
1981	4	2	0
1981	4	3	0
1981	4	4	0
1981	4	5	0
1981	4	6	0
1981	4	7	0
1981	4	8	0
1981	4	9	0
1981	4	10	0
1981	4	11	0
1981	4	12	0
1981	4	13	0
1981	4	14	0
1981	4	15	0
1981	4	16	0
1981	4	17	0
1981	4	18	0
1981	4	19	0
1981	4	20	0
1981	4	21	0
1981	4	22	0
1981	4	23	0
1981	4	24	0
1981	4	25	0
1981	4	26	0
1981	4	27	0
1981	4	28	11
1981	4	29	0
1981	4	30	0
1981	5	1	0
1981	5	2	0
1981	5	3	0
1981	5	4	0
1981	5	5	0
1981	5	6	0
1981	5	7	0
1981	5	8	0
1981	5	9	0
1981	5	10	0
1981	5	11	0
1981	5	12	0
1981	5	13	0
1981	5	14	0
1981	5	15	0
1981	5	16	0
1981	5	17	19.6	19.6
1981	5	18	4.6	4.6
1981	5	19	0.4	0.4
1981	5	20	0	24.6
1981	5	21	4
1981	5	22	0
1981	5	23	0
1981	5	24	0
1981	5	25	6.3
1981	5	26	2.6
1981	5	27	0
1981	5	28	0
1981	5	29	0
1981	5	30	0
1981	5	31	0
1981	6	1	0
1981	6	2	0
1981	6	3	0
1981	6	4	0
1981	6	5	0
1981	6	6	0
1981	6	7	0
1981	6	8	0
1981	6	9	0
1981	6	10	1
1981	6	11	18.3
1981	6	12	0
1981	6	13	0
1981	6	14	0
1981	6	15	5.2
1981	6	16	3.9	3.9
1981	6	17	7.4	7.4
1981	6	18	1.7	1.7
1981	6	19	0	0
1981	6	20	45.9	45.9
1981	6	21	3.9	58.9
1981	6	22	0
1981	6	23	0
1981	6	24	0
1981	6	25	0
1981	6	26	0
1981	6	27	0
1981	6	28	1
1981	6	29	0
1981	6	30	0
1981	7	1	0
1981	7	2	0
1981	7	3	0
1981	7	4	0
1981	7	5	3.9
1981	7	6	31.7
1981	7	7	0
1981	7	8	0
1981	7	9	0
1981	7	10	0	1.4
1981	7	11	1.4	18.3
1981	7	12	18.3	0
1981	7	13	0	15
1981	7	14	15	0
1981	7	15	0	34.7
1981	7	16	79.5
1981	7	17	0
1981	7	18	0.3
1981	7	19	0
1981	7	20	0	22.7
1981	7	21	22.7	0
1981	7	22	0	0
1981	7	23	0	0
1981	7	24	0	9.4
1981	7	25	9.4	32.1
1981	7	26	0
1981	7	27	0
1981	7	28	2.8
1981	7	29	0
1981	7	30	0
1981	7	31	0
1981	8	1	0.3
1981	8	2	0
1981	8	3	0.3
1981	8	4	0
1981	8	5	0
1981	8	6	44.4
1981	8	7	0
1981	8	8	0
1981	8	9	0
1981	8	10	0
1981	8	11	0
1981	8	12	0.3
1981	8	13	28.5
1981	8	14	0
1981	8	15	0
1981	8	16	0
1981	8	17	0.3
1981	8	18	11.9
1981	8	19	0
1981	8	20	0
1981	8	21	0
1981	8	22	0
1981	8	23	24.5
1981	8	24	0	0.9
1981	8	25	0	7
1981	8	26	0.9	3.5
1981	8	27	7	0.4
1981	8	28	3.5	0
1981	8	29	0.4	0
1981	8	30	0	11.8
1981	8	31	0	0.4
1981	9	1	0.4	0
1981	9	2	0	0.2
1981	9	3	0.2	3.2
1981	9	4	3.2	0
1981	9	5	0	3.8
1981	9	6	20.1
1981	9	7	0
1981	9	8	0
1981	9	9	18.4
1981	9	10	0
1981	9	11	0
1981	9	12	0
1981	9	13	20.5
1981	9	14	0
1981	9	15	0	14.9
1981	9	16	14.9	0
1981	9	17	0	0
1981	9	18	0	8.3
1981	9	19	8.3	23.2
1981	9	20	0
1981	9	21	0
1981	9	22	0
1981	9	23	22
1981	9	24	0
1981	9	25	0
1981	9	26	0
1981	9	27	1.1
1981	9	28	0
1981	9	29	0
1981	9	30	0
1981	10	1	0
1981	10	2	0
1981	10	3	0
1981	10	4	0
1981	10	5	0
1981	10	6	0
1981	10	7	0
1981	10	8	0
1981	10	9	0
1981	10	10	0
1981	10	11	0
1981	10	12	0
1981	10	13	0
1981	10	14	0
1981	10	15	0
1981	10	16	0
1981	10	17	0
1981	10	18	0
1981	10	19	0
1981	10	20	0
1981	10	21	0
1981	10	22	0
1981	10	23	0
1981	10	24	0
1981	10	25	0
1981	10	26	0
1981	10	27	0
1981	10	28	0
1981	10	29	0
1981	10	30	0
1981	10	31	0
1981	11	1	0
1981	11	2	0
1981	11	3	0
1981	11	4	0
1981	11	5	0
1981	11	6	0
1981	11	7	0
1981	11	8	0
1981	11	9	0
1981	11	10	0
1981	11	11	0
1981	11	12	0
1981	11	13	0
1981	11	14	0
1981	11	15	0
1981	11	16	0
1981	11	17	0
1981	11	18	0
1981	11	19	0
1981	11	20	0
1981	11	21	0
1981	11	22	0
1981	11	23	0
1981	11	24	0
1981	11	25	0
1981	11	26	0
1981	11	27	0
1981	11	28	0
1981	11	29	0
1981	11	30	0
1981	12	1	0
1981	12	2	0
1981	12	3	0
1981	12	4	0
1981	12	5	0
1981	12	6	0
1981	12	7	0
1981	12	8	0
1981	12	9	0
1981	12	10	0
1981	12	11	0
1981	12	12	0
1981	12	13	0
1981	12	14	0
1981	12	15	0
1981	12	16	0
1981	12	17	0
1981	12	18	0
1981	12	19	0
1981	12	20	0
1981	12	21	0
1981	12	22	0
1981	12	23	0
1981	12	24	0
1981	12	25	0
1981	12	26	0
1981	12	27	0
1981	12	28	0
1981	12	29	0
1981	12	30	0
1981	12	31	0
1982	1	1	0
1982	1	2	0
1982	1	3	0
1982	1	4	0
1982	1	5	0
1982	1	6	0
1982	1	7	0
1982	1	8	0
1982	1	9	0
1982	1	10	0
1982	1	11	0
1982	1	12	0
1982	1	13	0
1982	1	14	0
1982	1	15	0
1982	1	16	0
1982	1	17	0
1982	1	18	0
1982	1	19	0
1982	1	20	0
1982	1	21	0
1982	1	22	0
1982	1	23	0
1982	1	24	0
1982	1	25	0
1982	1	26	0
1982	1	27	0
1982	1	28	0
1982	1	29	0
1982	1	30	0
1982	1	31	0
1982	2	1	0
1982	2	2	0
1982	2	3	0
1982	2	4	0
1982	2	5	0
1982	2	6	0
1982	2	7	0
1982	2	8	0
1982	2	9	0
1982	2	10	0
1982	2	11	0
1982	2	12	0
1982	2	13	0
1982	2	14	0
1982	2	15	0
1982	2	16	0
1982	2	17	0
1982	2	18	0
1982	2	19	0
1982	2	20	0
1982	2	21	0
1982	2	22	0
1982	2	23	0
1982	2	24	0
1982	2	25	0
1982	2	26	0
1982	2	27	0
1982	2	28	0
1982	3	1	0
1982	3	2	0
1982	3	3	0
1982	3	4	0
1982	3	5	0
1982	3	6	0
1982	3	7	0
1982	3	8	0
1982	3	9	0
1982	3	10	0
1982	3	11	0
1982	3	12	0
1982	3	13	0
1982	3	14	0
1982	3	15	0
1982	3	16	0
1982	3	17	0
1982	3	18	0
1982	3	19	0
1982	3	20	0
1982	3	21	0
1982	3	22	0
1982	3	23	0
1982	3	24	0
1982	3	25	0
1982	3	26	0
1982	3	27	0
1982	3	28	0
1982	3	29	0
1982	3	30	0
1982	3	31	0
1982	4	1	0
1982	4	2	0
1982	4	3	0
1982	4	4	0
1982	4	5	0
1982	4	6	0
1982	4	7	0
1982	4	8	0
1982	4	9	0
1982	4	10	0
1982	4	11	0
1982	4	12	0
1982	4	13	0
1982	4	14	0
1982	4	15	0
1982	4	16	0
1982	4	17	0
1982	4	18	0
1982	4	19	0
1982	4	20	0
1982	4	21	0
1982	4	22	0
1982	4	23	0
1982	4	24	0
1982	4	25	0
1982	4	26	0
1982	4	27	0
1982	4	28	0
1982	4	29	0
1982	4	30	0
1982	5	1	0
1982	5	2	0
1982	5	3	0
1982	5	4	0
1982	5	5	0
1982	5	6	0
1982	5	7	0
1982	5	8	0
1982	5	9	0
1982	5	10	0
1982	5	11	0
1982	5	12	0
1982	5	13	0
1982	5	14	0
1982	5	15	0
1982	5	16	0
1982	5	17	6
1982	5	18	0
1982	5	19	0
1982	5	20	0
1982	5	21	0
1982	5	22	0
1982	5	23	0
1982	5	24	0
1982	5	25	0
1982	5	26	0
1982	5	27	0
1982	5	28	0
1982	5	29	0
1982	5	30	0
1982	5	31	0
1982	6	1	0
1982	6	2	0
1982	6	3	0
1982	6	4	0
1982	6	5	0
1982	6	6	0
1982	6	7	0
1982	6	8	0
1982	6	9	0
1982	6	10	18.3
1982	6	11	0
1982	6	12	0
1982	6	13	0
1982	6	14	0
1982	6	15	0
1982	6	16	3.8
1982	6	17	0
1982	6	18	0
1982	6	19	0
1982	6	20	0
1982	6	21	11.3
1982	6	22	0
1982	6	23	0
1982	6	24	0
1982	6	25	0
1982	6	26	0
1982	6	27	0
1982	6	28	0
1982	6	29	0
1982	6	30	0
1982	7	1	0
1982	7	2	0
1982	7	3	0
1982	7	4	0
1982	7	5	12.3
1982	7	6	0
1982	7	7	0
1982	7	8	15.4
1982	7	9	0.2
1982	7	10	0
1982	7	11	25.8
1982	7	12	0
1982	7	13	0
1982	7	14	12.3
1982	7	15	0
1982	7	16	0
1982	7	17	0
1982	7	18	0
1982	7	19	0
1982	7	20	0
1982	7	21	11.3
1982	7	22	0
1982	7	23	0
1982	7	24	0
1982	7	25	0
1982	7	26	0
1982	7	27	0
1982	7	28	0
1982	7	29	0
1982	7	30	0
1982	7	31	0
1982	8	1	0	21.6
1982	8	2	21.6	3.4
1982	8	3	3.4	40.6
1982	8	4	40.6	65.6	4.6
1982	8	5	0		4.4
1982	8	6	4.6		4.3
1982	8	7	4.4		0
1982	8	8	4.3		48.7
1982	8	9	0		62
1982	8	10	48.7
1982	8	11	0
1982	8	12	0
1982	8	13	0
1982	8	14	0
1982	8	15	23.7
1982	8	16	0	8.7
1982	8	17	0	29.8
1982	8	18	8.7	15.9
1982	8	19	29.8	54.4
1982	8	20	15.9
1982	8	21	0
1982	8	22	33.2
1982	8	23	0.2
1982	8	24	10
1982	8	25	0
1982	8	26	0
1982	8	27	0
1982	8	28	12.1
1982	8	29	0
1982	8	30	0
1982	8	31	7.1
1982	9	1	0
1982	9	2	33.7
1982	9	3	0
1982	9	4	0
1982	9	5	7.9
1982	9	6	0
1982	9	7	0
1982	9	8	0
1982	9	9	0
1982	9	10	0
1982	9	11	0
1982	9	12	0
1982	9	13	0
1982	9	14	0
1982	9	15	0
1982	9	16	0
1982	9	17	0
1982	9	18	0
1982	9	19	1
1982	9	20	0
1982	9	21	0
1982	9	22	0
1982	9	23	17.3
1982	9	24	0
1982	9	25	0
1982	9	26	0
1982	9	27	0
1982	9	28	0
1982	9	29	0
1982	9	30	0
1982	10	1	0
1982	10	2	0
1982	10	3	0
1982	10	4	0
1982	10	5	0
1982	10	6	0
1982	10	7	0
1982	10	8	0
1982	10	9	1.3
1982	10	10	0
1982	10	11	0
1982	10	12	0
1982	10	13	0
1982	10	14	0
1982	10	15	0
1982	10	16	0
1982	10	17	0
1982	10	18	0
1982	10	19	0
1982	10	20	0
1982	10	21	0
1982	10	22	0
1982	10	23	0
1982	10	24	0
1982	10	25	0
1982	10	26	0
1982	10	27	2.4
1982	10	28	7.4
1982	10	29	0
1982	10	30	0
1982	10	31	0
1982	11	1	0
1982	11	2	0
1982	11	3	0
1982	11	4	0
1982	11	5	0
1982	11	6	0
1982	11	7	0
1982	11	8	0
1982	11	9	0
1982	11	10	0
1982	11	11	0
1982	11	12	0
1982	11	13	0
1982	11	14	0
1982	11	15	0
1982	11	16	0
1982	11	17	0
1982	11	18	0
1982	11	19	0
1982	11	20	0
1982	11	21	0
1982	11	22	0
1982	11	23	0
1982	11	24	0
1982	11	25	0
1982	11	26	0
1982	11	27	0
1982	11	28	0
1982	11	29	0
1982	11	30	0
1982	12	1	0
1982	12	2	0
1982	12	3	0
1982	12	4	0
1982	12	5	0
1982	12	6	0
1982	12	7	0
1982	12	8	0
1982	12	9	0
1982	12	10	0
1982	12	11	0
1982	12	12	0
1982	12	13	0
1982	12	14	0
1982	12	15	0
1982	12	16	0
1982	12	17	0
1982	12	18	0
1982	12	19	0
1982	12	20	0
1982	12	21	0
1982	12	22	0
1982	12	23	0
1982	12	24	0
1982	12	25	0
1982	12	26	0
1982	12	27	0
1982	12	28	0
1982	12	29	0
1982	12	30	0
1982	12	31	0
1983	1	1	0
1983	1	2	0
1983	1	3	0
1983	1	4	0
1983	1	5	0
1983	1	6	0
1983	1	7	0
1983	1	8	0
1983	1	9	0
1983	1	10	0
1983	1	11	0
1983	1	12	0
1983	1	13	0
1983	1	14	0
1983	1	15	0
1983	1	16	0
1983	1	17	0
1983	1	18	0
1983	1	19	0
1983	1	20	0
1983	1	21	0
1983	1	22	0
1983	1	23	0
1983	1	24	0
1983	1	25	0
1983	1	26	0
1983	1	27	0
1983	1	28	0
1983	1	29	0
1983	1	30	0
1983	1	31	0
1983	2	1	0
1983	2	2	0
1983	2	3	0
1983	2	4	0
1983	2	5	0
1983	2	6	0
1983	2	7	0
1983	2	8	0
1983	2	9	0
1983	2	10	0
1983	2	11	0
1983	2	12	0
1983	2	13	0
1983	2	14	0
1983	2	15	0
1983	2	16	0
1983	2	17	0
1983	2	18	0
1983	2	19	0
1983	2	20	0
1983	2	21	0
1983	2	22	0
1983	2	23	0
1983	2	24	0
1983	2	25	0
1983	2	26	0
1983	2	27	0
1983	2	28	0
1983	3	1	0
1983	3	2	0
1983	3	3	0
1983	3	4	0
1983	3	5	0
1983	3	6	0
1983	3	7	0
1983	3	8	0
1983	3	9	0
1983	3	10	0
1983	3	11	0
1983	3	12	0
1983	3	13	0
1983	3	14	0
1983	3	15	0
1983	3	16	0
1983	3	17	0
1983	3	18	0
1983	3	19	0
1983	3	20	0
1983	3	21	0
1983	3	22	0
1983	3	23	0
1983	3	24	0
1983	3	25	0
1983	3	26	0
1983	3	27	0
1983	3	28	0
1983	3	29	0.8
1983	3	30	0
1983	3	31	0
1983	4	1	0
1983	4	2	0
1983	4	3	0
1983	4	4	0
1983	4	5	0
1983	4	6	0
1983	4	7	0
1983	4	8	0
1983	4	9	0
1983	4	10	0
1983	4	11	0
1983	4	12	0
1983	4	13	0
1983	4	14	0
1983	4	15	0
1983	4	16	0
1983	4	17	0
1983	4	18	0
1983	4	19	0
1983	4	20	0
1983	4	21	0
1983	4	22	0
1983	4	23	0
1983	4	24	0
1983	4	25	0
1983	4	26	0
1983	4	27	0
1983	4	28	0
1983	4	29	0
1983	4	30	0
1983	5	1	0
1983	5	2	0
1983	5	3	0
1983	5	4	0
1983	5	5	0
1983	5	6	0
1983	5	7	0
1983	5	8	0
1983	5	9	0
1983	5	10	0
1983	5	11	0
1983	5	12	0
1983	5	13	0
1983	5	14	0
1983	5	15	0
1983	5	16	0
1983	5	17	0
1983	5	18	0
1983	5	19	0
1983	5	20	0
1983	5	21	0
1983	5	22	0
1983	5	23	0
1983	5	24	44.7
1983	5	25	0
1983	5	26	0
1983	5	27	0
1983	5	28	0
1983	5	29	0
1983	5	30	0
1983	5	31	0
1983	6	1	0
1983	6	2	0
1983	6	3	0
1983	6	4	0
1983	6	5	0
1983	6	6	0
1983	6	7	0
1983	6	8	0
1983	6	9	0
1983	6	10	0
1983	6	11	0
1983	6	12	0
1983	6	13	0
1983	6	14	0
1983	6	15	9.3
1983	6	16	73.8
1983	6	17	0
1983	6	18	0
1983	6	19	0.7
1983	6	20	0
1983	6	21	53.3
1983	6	22	0
1983	6	23	0
1983	6	24	0
1983	6	25	17.3
1983	6	26	0
1983	6	27	0
1983	6	28	0
1983	6	29	0
1983	6	30	0
1983	7	1	0.3
1983	7	2	0
1983	7	3	66.2
1983	7	4	0
1983	7	5	0
1983	7	6	0
1983	7	7	0
1983	7	8	0
1983	7	9	0
1983	7	10	0
1983	7	11	9.6
1983	7	12	0
1983	7	13	0
1983	7	14	0
1983	7	15	0	40.1
1983	7	16	0	0
1983	7	17	40.1	24.4
1983	7	18	0	64.5
1983	7	19	24.4
1983	7	20	0
1983	7	21	26.2
1983	7	22	0
1983	7	23	0
1983	7	24	0	13.5
1983	7	25	0	0
1983	7	26	0	0
1983	7	27	13.5	19.8
1983	7	28	0	19.6
1983	7	29	0	52.9
1983	7	30	19.8
1983	7	31	19.6
1983	8	1	0
1983	8	2	0
1983	8	3	1.1
1983	8	4	2.4
1983	8	5	0	36.9
1983	8	6	36.9	4.9
1983	8	7	4.9	0
1983	8	8	0	0
1983	8	9	0	26.3
1983	8	10	26.3	68.1
1983	8	11	1.4
1983	8	12	0
1983	8	13	0
1983	8	14	0
1983	8	15	0	29.1
1983	8	16	0	0.6
1983	8	17	0
1983	8	18	29.1
1983	8	19	0.6
1983	8	20	0
1983	8	21	0
1983	8	22	0.2
1983	8	23	0
1983	8	24	0
1983	8	25	15.2
1983	8	26	0
1983	8	27	0
1983	8	28	0
1983	8	29	0
1983	8	30	0
1983	8	31	0
1983	9	1	7.2
1983	9	2	4.2
1983	9	3	0
1983	9	4	0
1983	9	5	0
1983	9	6	6
1983	9	7	15.2
1983	9	8	0
1983	9	9	0
1983	9	10	2.1
1983	9	11	0
1983	9	12	0
1983	9	13	0
1983	9	14	1
1983	9	15	0
1983	9	16	27.1
1983	9	17	0
1983	9	18	0
1983	9	19	0
1983	9	20	0
1983	9	21	0
1983	9	22	0
1983	9	23	0
1983	9	24	0
1983	9	25	0
1983	9	26	0
1983	9	27	0
1983	9	28	0
1983	9	29	0
1983	9	30	0
1983	10	1	0
1983	10	2	0
1983	10	3	0
1983	10	4	0
1983	10	5	0
1983	10	6	0
1983	10	7	0
1983	10	8	0
1983	10	9	0
1983	10	10	0
1983	10	11	0
1983	10	12	0
1983	10	13	0
1983	10	14	0
1983	10	15	0
1983	10	16	0
1983	10	17	0
1983	10	18	0
1983	10	19	0
1983	10	20	0
1983	10	21	0
1983	10	22	0
1983	10	23	0
1983	10	24	0
1983	10	25	0
1983	10	26	0
1983	10	27	0
1983	10	28	0
1983	10	29	0
1983	10	30	0
1983	10	31	0
1983	11	1	0
1983	11	2	0
1983	11	3	0
1983	11	4	0
1983	11	5	0
1983	11	6	0
1983	11	7	0
1983	11	8	0
1983	11	9	0
1983	11	10	0
1983	11	11	0
1983	11	12	0
1983	11	13	0
1983	11	14	0
1983	11	15	0
1983	11	16	0
1983	11	17	0
1983	11	18	0
1983	11	19	0
1983	11	20	0
1983	11	21	0
1983	11	22	0
1983	11	23	0
1983	11	24	0
1983	11	25	0
1983	11	26	0
1983	11	27	0
1983	11	28	0
1983	11	29	0
1983	11	30	0
1983	12	1	0
1983	12	2	0
1983	12	3	0
1983	12	4	0
1983	12	5	0
1983	12	6	0
1983	12	7	0
1983	12	8	0
1983	12	9	0
1983	12	10	0
1983	12	11	0
1983	12	12	0
1983	12	13	0
1983	12	14	0
1983	12	15	0
1983	12	16	0
1983	12	17	0
1983	12	18	0
1983	12	19	0
1983	12	20	0
1983	12	21	0
1983	12	22	0
1983	12	23	0
1983	12	24	0
1983	12	25	0
1983	12	26	0
1983	12	27	0
1983	12	28	0
1983	12	29	0
1983	12	30	0
1983	12	31	0
1984	1	1	0
1984	1	2	0
1984	1	3	0
1984	1	4	0
1984	1	5	0
1984	1	6	0
1984	1	7	0
1984	1	8	0
1984	1	9	0
1984	1	10	0
1984	1	11	0
1984	1	12	0
1984	1	13	0
1984	1	14	0
1984	1	15	0
1984	1	16	0
1984	1	17	0
1984	1	18	0
1984	1	19	0
1984	1	20	0
1984	1	21	0
1984	1	22	0
1984	1	23	0
1984	1	24	0
1984	1	25	0
1984	1	26	0
1984	1	27	0
1984	1	28	0
1984	1	29	0
1984	1	30	0
1984	1	31	0
1984	2	1	0
1984	2	2	0
1984	2	3	0
1984	2	4	0
1984	2	5	0
1984	2	6	0
1984	2	7	0
1984	2	8	0
1984	2	9	0
1984	2	10	0
1984	2	11	0
1984	2	12	0
1984	2	13	0
1984	2	14	0
1984	2	15	0
1984	2	16	0
1984	2	17	0
1984	2	18	0
1984	2	19	0
1984	2	20	0
1984	2	21	0
1984	2	22	0
1984	2	23	0
1984	2	24	0
1984	2	25	0
1984	2	26	0
1984	2	27	0
1984	2	28	0
1984	2	29	0
1984	3	1	0
1984	3	2	0
1984	3	3	0
1984	3	4	0
1984	3	5	0
1984	3	6	0
1984	3	7	0
1984	3	8	0
1984	3	9	0
1984	3	10	0
1984	3	11	0
1984	3	12	0
1984	3	13	0
1984	3	14	0
1984	3	15	0
1984	3	16	0
1984	3	17	0
1984	3	18	0
1984	3	19	0
1984	3	20	0
1984	3	21	0
1984	3	22	0
1984	3	23	0
1984	3	24	0
1984	3	25	0
1984	3	26	0
1984	3	27	0
1984	3	28	0
1984	3	29	0
1984	3	30	0
1984	3	31	0
1984	4	1	0
1984	4	2	0
1984	4	3	0
1984	4	4	0
1984	4	5	0
1984	4	6	0
1984	4	7	0
1984	4	8	0
1984	4	9	0
1984	4	10	0
1984	4	11	0
1984	4	12	0
1984	4	13	0
1984	4	14	0
1984	4	15	0
1984	4	16	0
1984	4	17	0
1984	4	18	0
1984	4	19	0
1984	4	20	0
1984	4	21	0
1984	4	22	0
1984	4	23	0
1984	4	24	0
1984	4	25	0
1984	4	26	0
1984	4	27	0
1984	4	28	0
1984	4	29	0
1984	4	30	0
1984	5	1	0
1984	5	2	0
1984	5	3	0
1984	5	4	0
1984	5	5	17
1984	5	6	0
1984	5	7	0
1984	5	8	0
1984	5	9	0
1984	5	10	0
1984	5	11	0
1984	5	12	0
1984	5	13	0
1984	5	14	0
1984	5	15	0
1984	5	16	0
1984	5	17	14.5
1984	5	18	0
1984	5	19	0
1984	5	20	0
1984	5	21	0
1984	5	22	8.7
1984	5	23	0
1984	5	24	0
1984	5	25	0
1984	5	26	0
1984	5	27	0
1984	5	28	0
1984	5	29	0
1984	5	30	0
1984	5	31	3.1
1984	6	1	0
1984	6	2	0
1984	6	3	0
1984	6	4	0
1984	6	5	0
1984	6	6	0
1984	6	7	0
1984	6	8	0
1984	6	9	0
1984	6	10	0
1984	6	11	0
1984	6	12	33.6
1984	6	13	14.4
1984	6	14	0
1984	6	15	0
1984	6	16	6.7
1984	6	17	0
1984	6	18	0
1984	6	19	0
1984	6	20	0
1984	6	21	0
1984	6	22	0
1984	6	23	0
1984	6	24	0
1984	6	25	0
1984	6	26	0
1984	6	27	0
1984	6	28	0
1984	6	29	0
1984	6	30	31.9
1984	7	1	0
1984	7	2	0
1984	7	3	0
1984	7	4	0
1984	7	5	0
1984	7	6	0
1984	7	7	0
1984	7	8	0
1984	7	9	0
1984	7	10	0
1984	7	11	0
1984	7	12	0
1984	7	13	0
1984	7	14	0
1984	7	15	0
1984	7	16	0
1984	7	17	0
1984	7	18	0
1984	7	19	0
1984	7	20	0
1984	7	21	0
1984	7	22	0
1984	7	23	0
1984	7	24	0
1984	7	25	0
1984	7	26	0
1984	7	27	0
1984	7	28	0
1984	7	29	0
1984	7	30	0
1984	7	31	0
1984	8	1	0
1984	8	2	0
1984	8	3	0
1984	8	4	0
1984	8	5	0
1984	8	6	0
1984	8	7	0
1984	8	8	0
1984	8	9	0
1984	8	10	0
1984	8	11	0
1984	8	12	0
1984	8	13	0
1984	8	14	0
1984	8	15	0
1984	8	16	0
1984	8	17	0
1984	8	18	0
1984	8	19	0
1984	8	20	0
1984	8	21	0
1984	8	22	0
1984	8	23	0
1984	8	24	0
1984	8	25	0
1984	8	26	0
1984	8	27	0
1984	8	28	0
1984	8	29	0
1984	8	30	0
1984	8	31	0
1984	9	1	0	34.5
1984	9	2	0	0
1984	9	3	34.5	7.7
1984	9	4	0	42.2
1984	9	5	7.7
1984	9	6	0
1984	9	7	14.5
1984	9	8	0
1984	9	9	0
1984	9	10	0
1984	9	11	0
1984	9	12	0
1984	9	13	0
1984	9	14	0
1984	9	15	0	4.5
1984	9	16	0	0
1984	9	17	4.5	0
1984	9	18	0	1.7
1984	9	19	0	6.2
1984	9	20	1.7
1984	9	21	12.9
1984	9	22	0
1984	9	23	0
1984	9	24	0
1984	9	25	0	27.3
1984	9	26	27.3	17
1984	9	27	17	0.6
1984	9	28	0.6	4.7
1984	9	29	4.7	49.6
1984	9	30	0
1984	10	1	0
1984	10	2	0
1984	10	3	0
1984	10	4	0
1984	10	5	0
1984	10	6	0
1984	10	7	0
1984	10	8	0
1984	10	9	0
1984	10	10	0
1984	10	11	0
1984	10	12	0
1984	10	13	0
1984	10	14	0
1984	10	15	0
1984	10	16	0
1984	10	17	0
1984	10	18	0
1984	10	19	0
1984	10	20	0
1984	10	21	0
1984	10	22	0
1984	10	23	0
1984	10	24	0
1984	10	25	0
1984	10	26	0
1984	10	27	0
1984	10	28	0
1984	10	29	0
1984	10	30	0
1984	10	31	0
1984	11	1	0
1984	11	2	0
1984	11	3	0
1984	11	4	0
1984	11	5	0
1984	11	6	0
1984	11	7	0
1984	11	8	0
1984	11	9	0
1984	11	10	0
1984	11	11	0
1984	11	12	0
1984	11	13	0
1984	11	14	0
1984	11	15	0
1984	11	16	0
1984	11	17	0
1984	11	18	0
1984	11	19	0
1984	11	20	0
1984	11	21	0
1984	11	22	0
1984	11	23	0
1984	11	24	0
1984	11	25	0
1984	11	26	0
1984	11	27	0
1984	11	28	0
1984	11	29	0
1984	11	30	0
1984	12	1	0
1984	12	2	0
1984	12	3	0
1984	12	4	0
1984	12	5	0
1984	12	6	0
1984	12	7	0
1984	12	8	0
1984	12	9	0
1984	12	10	0
1984	12	11	0
1984	12	12	0
1984	12	13	0
1984	12	14	0
1984	12	15	0
1984	12	16	0
1984	12	17	0
1984	12	18	0
1984	12	19	0
1984	12	20	0
1984	12	21	0
1984	12	22	0
1984	12	23	0
1984	12	24	0
1984	12	25	0
1984	12	26	0
1984	12	27	0
1984	12	28	0
1984	12	29	0
1984	12	30	0
1984	12	31	0
1985	1	1	0
1985	1	2	0
1985	1	3	0
1985	1	4	0
1985	1	5	0
1985	1	6	0
1985	1	7	0
1985	1	8	0
1985	1	9	0
1985	1	10	0
1985	1	11	0
1985	1	12	0
1985	1	13	0
1985	1	14	0
1985	1	15	0
1985	1	16	0
1985	1	17	0
1985	1	18	0
1985	1	19	0
1985	1	20	0
1985	1	21	0
1985	1	22	0
1985	1	23	0
1985	1	24	0
1985	1	25	0
1985	1	26	0
1985	1	27	0
1985	1	28	0
1985	1	29	0
1985	1	30	0
1985	1	31	0
1985	2	1	0
1985	2	2	0
1985	2	3	0
1985	2	4	0
1985	2	5	0
1985	2	6	0
1985	2	7	0
1985	2	8	0
1985	2	9	0
1985	2	10	0
1985	2	11	0
1985	2	12	0
1985	2	13	0
1985	2	14	0
1985	2	15	0
1985	2	16	0
1985	2	17	0
1985	2	18	0
1985	2	19	0
1985	2	20	0
1985	2	21	0
1985	2	22	0
1985	2	23	0
1985	2	24	0
1985	2	25	0
1985	2	26	0
1985	2	27	0
1985	2	28	0
1985	3	1	0
1985	3	2	0
1985	3	3	0
1985	3	4	0
1985	3	5	0
1985	3	6	0
1985	3	7	0
1985	3	8	0
1985	3	9	0
1985	3	10	0
1985	3	11	0
1985	3	12	0
1985	3	13	0
1985	3	14	0
1985	3	15	0
1985	3	16	0
1985	3	17	0
1985	3	18	0
1985	3	19	0
1985	3	20	0
1985	3	21	0
1985	3	22	0
1985	3	23	0
1985	3	24	0
1985	3	25	0
1985	3	26	0
1985	3	27	0
1985	3	28	0
1985	3	29	0
1985	3	30	0
1985	3	31	0
1985	4	1	0
1985	4	2	0
1985	4	3	0
1985	4	4	0
1985	4	5	0
1985	4	6	0
1985	4	7	0
1985	4	8	0
1985	4	9	0
1985	4	10	0
1985	4	11	0
1985	4	12	0
1985	4	13	0
1985	4	14	0
1985	4	15	0
1985	4	16	0
1985	4	17	0
1985	4	18	0
1985	4	19	0
1985	4	20	0
1985	4	21	0
1985	4	22	0
1985	4	23	0
1985	4	24	0
1985	4	25	0
1985	4	26	0
1985	4	27	0
1985	4	28	0
1985	4	29	0
1985	4	30	0
1985	5	1	0
1985	5	2	0
1985	5	3	0
1985	5	4	0
1985	5	5	0
1985	5	6	0
1985	5	7	0
1985	5	8	0
1985	5	9	0
1985	5	10	0
1985	5	11	0
1985	5	12	0
1985	5	13	3.3
1985	5	14	0
1985	5	15	0
1985	5	16	0
1985	5	17	0
1985	5	18	0
1985	5	19	0
1985	5	20	0
1985	5	21	0
1985	5	22	0
1985	5	23	0
1985	5	24	0
1985	5	25	4.1
1985	5	26	0
1985	5	27	0
1985	5	28	0
1985	5	29	20.5
1985	5	30	0
1985	5	31	0
1985	6	1	0
1985	6	2	0
1985	6	3	0
1985	6	4	0
1985	6	5	0
1985	6	6	0
1985	6	7	0
1985	6	8	0
1985	6	9	0
1985	6	10	0
1985	6	11	0
1985	6	12	0
1985	6	13	0
1985	6	14	0
1985	6	15	0
1985	6	16	0
1985	6	17	46.7
1985	6	18	0
1985	6	19	0
1985	6	20	0
1985	6	21	0
1985	6	22	6
1985	6	23	0
1985	6	24	6
1985	6	25	0
1985	6	26	10.5
1985	6	27	0
1985	6	28	0
1985	6	29	26
1985	6	30	0		1.8
1985	7	1	1.8		0.8
1985	7	2	0.8		1.9
1985	7	3	1.9		0
1985	7	4	0		17.1
1985	7	5	17.1		21.6
1985	7	6	5.9
1985	7	7	0
1985	7	8	0
1985	7	9	0
1985	7	10	0
1985	7	11	0
1985	7	12	0
1985	7	13	16
1985	7	14	0
1985	7	15	0
1985	7	16	0
1985	7	17	0
1985	7	18	0
1985	7	19	41.6
1985	7	20	2.5
1985	7	21	0
1985	7	22	0
1985	7	23	0
1985	7	24	0
1985	7	25	0
1985	7	26	0
1985	7	27	0
1985	7	28	0
1985	7	29	1.2
1985	7	30	7.9
1985	7	31	0
1985	8	1	0
1985	8	2	0.9
1985	8	3	4.7
1985	8	4	0
1985	8	5	0
1985	8	6	0
1985	8	7	0
1985	8	8	0
1985	8	9	25.2		36.8
1985	8	10	0		13.4
1985	8	11	36.8		0
1985	8	12	13.4		0
1985	8	13	0		13.3
1985	8	14	0		63.5
1985	8	15	13.3	3
1985	8	16	3	0
1985	8	17	0	18.3
1985	8	18	18.3	21.3
1985	8	19	0
1985	8	20	0
1985	8	21	0
1985	8	22	0
1985	8	23	12.4
1985	8	24	0
1985	8	25	8.2
1985	8	26	0
1985	8	27	0	3.2
1985	8	28	3.2	2.1
1985	8	29	2.1	1.8
1985	8	30	1.8	7.1
1985	8	31	0
1985	9	1	14.8
1985	9	2	3.8
1985	9	3	0
1985	9	4	0
1985	9	5	0
1985	9	6	6
1985	9	7	0
1985	9	8	0
1985	9	9	2.6
1985	9	10	0
1985	9	11	17.5
1985	9	12	0
1985	9	13	0
1985	9	14	0
1985	9	15	0
1985	9	16	16.8
1985	9	17	0
1985	9	18	0
1985	9	19	0
1985	9	20	0
1985	9	21	0
1985	9	22	0
1985	9	23	0
1985	9	24	0
1985	9	25	0
1985	9	26	0
1985	9	27	10.2
1985	9	28	0
1985	9	29	0
1985	9	30	0
1985	10	1	0
1985	10	2	0
1985	10	3	0
1985	10	4	0
1985	10	5	0
1985	10	6	0
1985	10	7	0
1985	10	8	0
1985	10	9	0
1985	10	10	0
1985	10	11	0
1985	10	12	0
1985	10	13	0
1985	10	14	0
1985	10	15	0
1985	10	16	0
1985	10	17	0
1985	10	18	0
1985	10	19	0
1985	10	20	0
1985	10	21	0
1985	10	22	0
1985	10	23	0
1985	10	24	0
1985	10	25	0
1985	10	26	0
1985	10	27	0
1985	10	28	0
1985	10	29	0
1985	10	30	0
1985	10	31	0
1985	11	1	0
1985	11	2	0
1985	11	3	0
1985	11	4	0
1985	11	5	0
1985	11	6	0
1985	11	7	0
1985	11	8	0
1985	11	9	0
1985	11	10	0
1985	11	11	0
1985	11	12	0
1985	11	13	0
1985	11	14	0
1985	11	15	0
1985	11	16	0
1985	11	17	0
1985	11	18	0
1985	11	19	0
1985	11	20	0
1985	11	21	0
1985	11	22	0
1985	11	23	0
1985	11	24	0
1985	11	25	0
1985	11	26	0
1985	11	27	0
1985	11	28	0
1985	11	29	0
1985	11	30	0
1985	12	1	0
1985	12	2	0
1985	12	3	0
1985	12	4	0
1985	12	5	0
1985	12	6	0
1985	12	7	0
1985	12	8	0
1985	12	9	0
1985	12	10	0
1985	12	11	0
1985	12	12	0
1985	12	13	0
1985	12	14	0
1985	12	15	0
1985	12	16	0
1985	12	17	0
1985	12	18	0
1985	12	19	0
1985	12	20	0
1985	12	21	0
1985	12	22	0
1985	12	23	0
1985	12	24	0
1985	12	25	0
1985	12	26	0
1985	12	27	0
1985	12	28	0
1985	12	29	0
1985	12	30	0
1985	12	31	0
1986	1	1	0
1986	1	2	0
1986	1	3	0
1986	1	4	0
1986	1	5	0
1986	1	6	0
1986	1	7	0
1986	1	8	0
1986	1	9	0
1986	1	10	0
1986	1	11	0
1986	1	12	0
1986	1	13	0
1986	1	14	0
1986	1	15	0
1986	1	16	0
1986	1	17	0
1986	1	18	0
1986	1	19	0
1986	1	20	0
1986	1	21	0
1986	1	22	0
1986	1	23	0
1986	1	24	0
1986	1	25	0
1986	1	26	0
1986	1	27	0
1986	1	28	0
1986	1	29	0
1986	1	30	0
1986	1	31	0
1986	2	1	0
1986	2	2	0
1986	2	3	0
1986	2	4	0
1986	2	5	0
1986	2	6	0
1986	2	7	0
1986	2	8	0
1986	2	9	0
1986	2	10	0
1986	2	11	0
1986	2	12	0
1986	2	13	0
1986	2	14	0
1986	2	15	0
1986	2	16	0
1986	2	17	0
1986	2	18	0
1986	2	19	0
1986	2	20	0
1986	2	21	0
1986	2	22	0
1986	2	23	0
1986	2	24	0
1986	2	25	0
1986	2	26	0
1986	2	27	0
1986	2	28	0
1986	3	1	0
1986	3	2	0
1986	3	3	0
1986	3	4	0
1986	3	5	0
1986	3	6	0
1986	3	7	0
1986	3	8	0
1986	3	9	0
1986	3	10	0
1986	3	11	0
1986	3	12	0
1986	3	13	0
1986	3	14	0
1986	3	15	0
1986	3	16	0
1986	3	17	0
1986	3	18	0
1986	3	19	0
1986	3	20	0
1986	3	21	0
1986	3	22	0
1986	3	23	0
1986	3	24	0
1986	3	25	0
1986	3	26	0
1986	3	27	0
1986	3	28	0
1986	3	29	0
1986	3	30	0
1986	3	31	0
1986	4	1	0
1986	4	2	0
1986	4	3	0
1986	4	4	0
1986	4	5	0
1986	4	6	0
1986	4	7	0
1986	4	8	0
1986	4	9	0
1986	4	10	0
1986	4	11	0
1986	4	12	0
1986	4	13	0
1986	4	14	0
1986	4	15	0
1986	4	16	0
1986	4	17	0
1986	4	18	0
1986	4	19	0
1986	4	20	0
1986	4	21	0
1986	4	22	0
1986	4	23	0
1986	4	24	0
1986	4	25	0
1986	4	26	0
1986	4	27	0
1986	4	28	0
1986	4	29	0
1986	4	30	0
1986	5	1	0
1986	5	2	0
1986	5	3	0
1986	5	4	0
1986	5	5	0
1986	5	6	0
1986	5	7	0
1986	5	8	0
1986	5	9	0
1986	5	10	0
1986	5	11	0
1986	5	12	0
1986	5	13	0
1986	5	14	0
1986	5	15	21
1986	5	16	0
1986	5	17	0
1986	5	18	0
1986	5	19	0
1986	5	20	0
1986	5	21	3.5
1986	5	22	0
1986	5	23	0
1986	5	24	0
1986	5	25	0
1986	5	26	0
1986	5	27	0
1986	5	28	0
1986	5	29	0
1986	5	30	0
1986	5	31	0
1986	6	1	0
1986	6	2	0
1986	6	3	0
1986	6	4	0
1986	6	5	0
1986	6	6	0
1986	6	7	0
1986	6	8	0
1986	6	9	0
1986	6	10	0
1986	6	11	0
1986	6	12	0
1986	6	13	0
1986	6	14	0
1986	6	15	0
1986	6	16	0
1986	6	17	0
1986	6	18	0
1986	6	19	0
1986	6	20	0
1986	6	21	0
1986	6	22	0
[truncated: 9,689 more rows]
[truncated: 2 more columns]
